# Supplementary material for: Circulating microRNA Panel for Prediction of Recurrence and Survival in Early-Stage Lung Adenocarcinoma
Source: MDPI journal article supplement (doi:10.3390/ijms25042331), 2024-02-16
Supplement: s1 [file s1]

**Supplementary Table S1. Adjuvant chemotherapy and recurrence in test set**

| <b>Adjuvant<br/>chemotherapy*</b> | <b>Total</b> | <b>Recurrence<br/>no. (%)</b> | <b>Non-recurrence<br/>no. (%)</b> | <b>P value†</b> |
|-----------------------------------|--------------|-------------------------------|-----------------------------------|-----------------|
| <b>Stage I</b>                    |              |                               |                                   |                 |
| Yes                               | 2            | 1 (50.0)                      | 1 (50.0)                          | 0.4773          |
| No                                | 31           | 8 (25.8)                      | 23 (74.2)                         |                 |
| <b>Stage II</b>                   |              |                               |                                   |                 |
| Yes                               | 13           | 10 (76.9)                     | 3 (23.1)                          | 0.1736          |
| No                                | 7            | 3 (42.9)                      | 4 (57.1)                          |                 |

\*Information was not available for three stage I and one stage II LUAD patients.

†P values were calculated using Fisher's exact test.
